# Supplementary material for: Mechanistic study of the role of Au, Pd and Au–Pd in the surface reactions of ethanol over TiO2in the dark and under photo-excitation
Source: Royal Society of Chemistry journal article supplement (doi:10.1039/c7cy00961e), 2017-01-01
Supplement: c7cy00961e1.pdf [file c7cy00961e1.pdf]

## Supplementary Information

### Mechanistic study of the role of Au, Pd and Au-Pd on surface reactions of TiO<sub>2</sub> in the dark and under photo-excitation.

Shahid Bashir and Hicham Idriss\*

SABIC Corporate Research and Development (CRD) Center at KAUST, Thuwal, KSA

\*Corresponding author: [idirssh@sabic.com](mailto:idirssh@sabic.com)

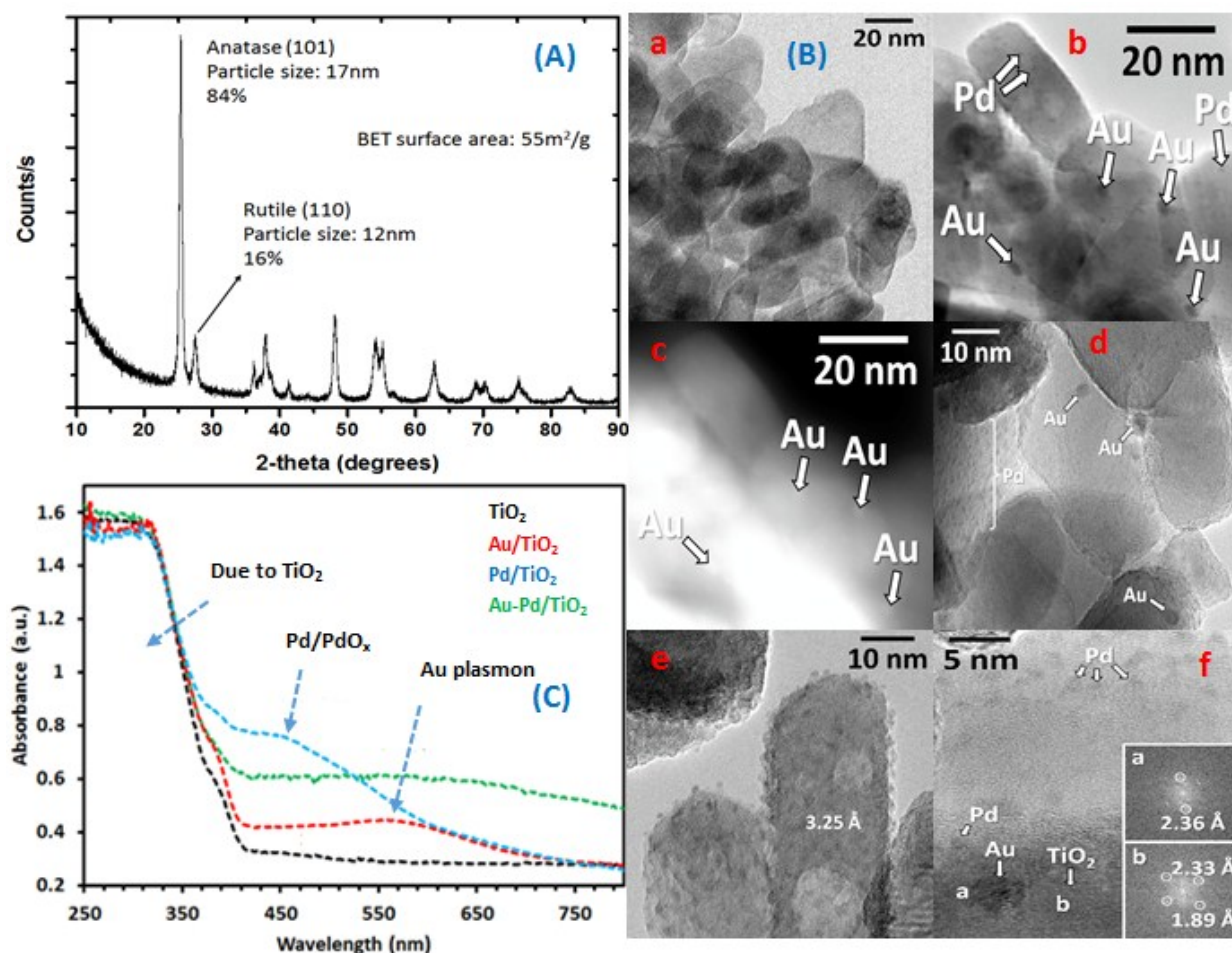

**Figure SI-1:**

(A) (a) Low Resolution TEM image of TiO<sub>2</sub> (A+R) particles (b) TEM image of 0.13 wt.% Au- 0.2 wt.% Pd/TiO<sub>2</sub> particle (c) combined BF and HAADF images in STEM mode of Au-Pd/TiO<sub>2</sub> (d, e and f) HRTEM images of Au-Pd/TiO<sub>2</sub> (inset show FT of Au and Pd).

(B) XRD pattern of TiO<sub>2</sub> (A+R) powder.

(C) UV-Vis spectra of  $\text{TiO}_2$  and  $\text{M/TiO}_2$  ( $\text{M} = 1.2 \text{ wt.}\% \text{ Au}$ ,  $2.0 \text{ wt.}\% \text{ Pd}$  and  $3.2 \text{ wt.}\% \text{ Au-Pd}$ )

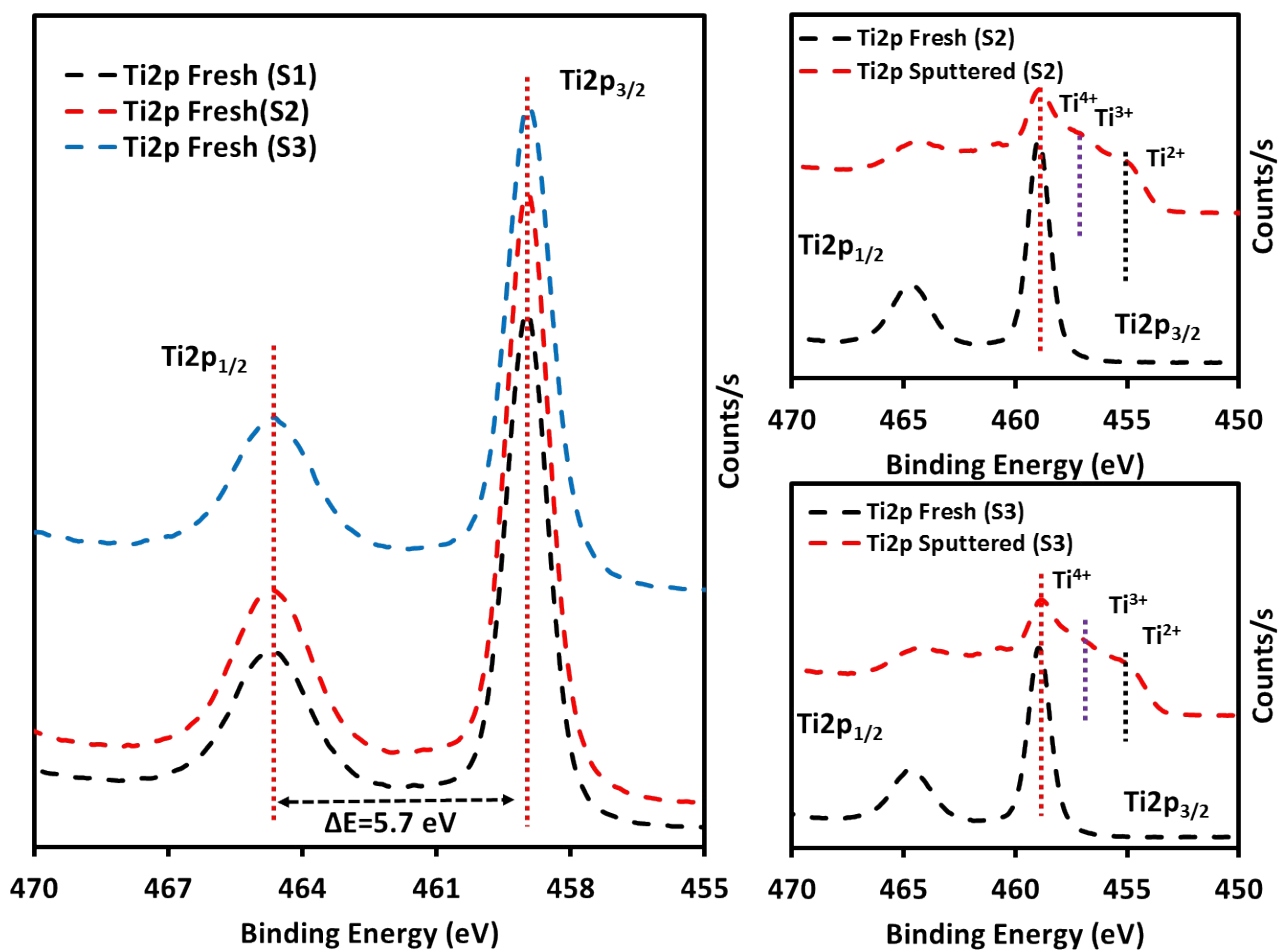

**Figure SI-2:**

XPS of Ti2p; before ion sputtering (fresh) and after 5 min  $\text{Ar}^+$ -sputtering of  $\text{Au-Pd/TiO}_2$ . Samples S1 (1.2 wt.% Au; 2.0 wt.% Pd), S2 (0.13 wt.% Au; 0.2 wt.% Pd) and S3 (0.06 wt.% Au; 0.1 wt.% Pd)

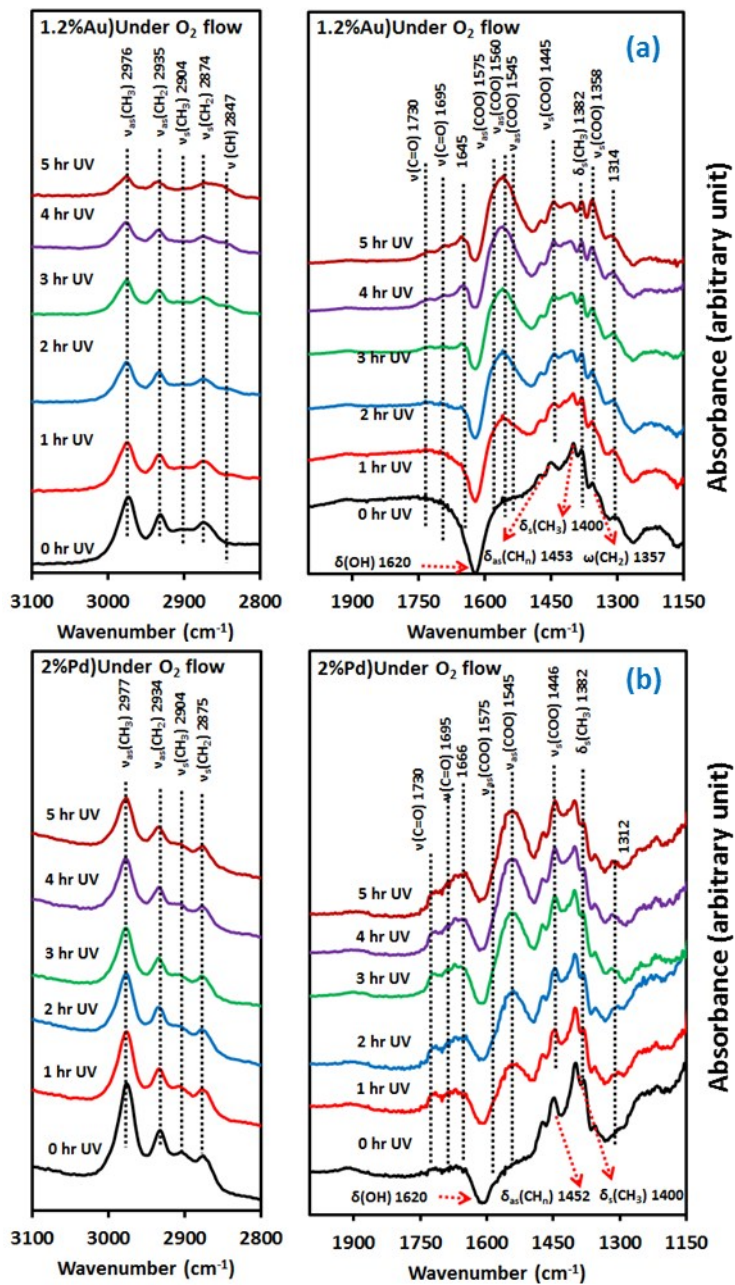

**Figure SI-3:**

FTIR spectra during the photo-reaction of ethanol in the presence of O<sub>2</sub> over (a) 1.2 wt.% Au/TiO<sub>2</sub> and (b) 2.0 wt.% Pd/TiO<sub>2</sub>.

The surface was initially saturated with ethanol at 300 K, O<sub>2</sub> flow = 30 mL/min, P = 1 atm

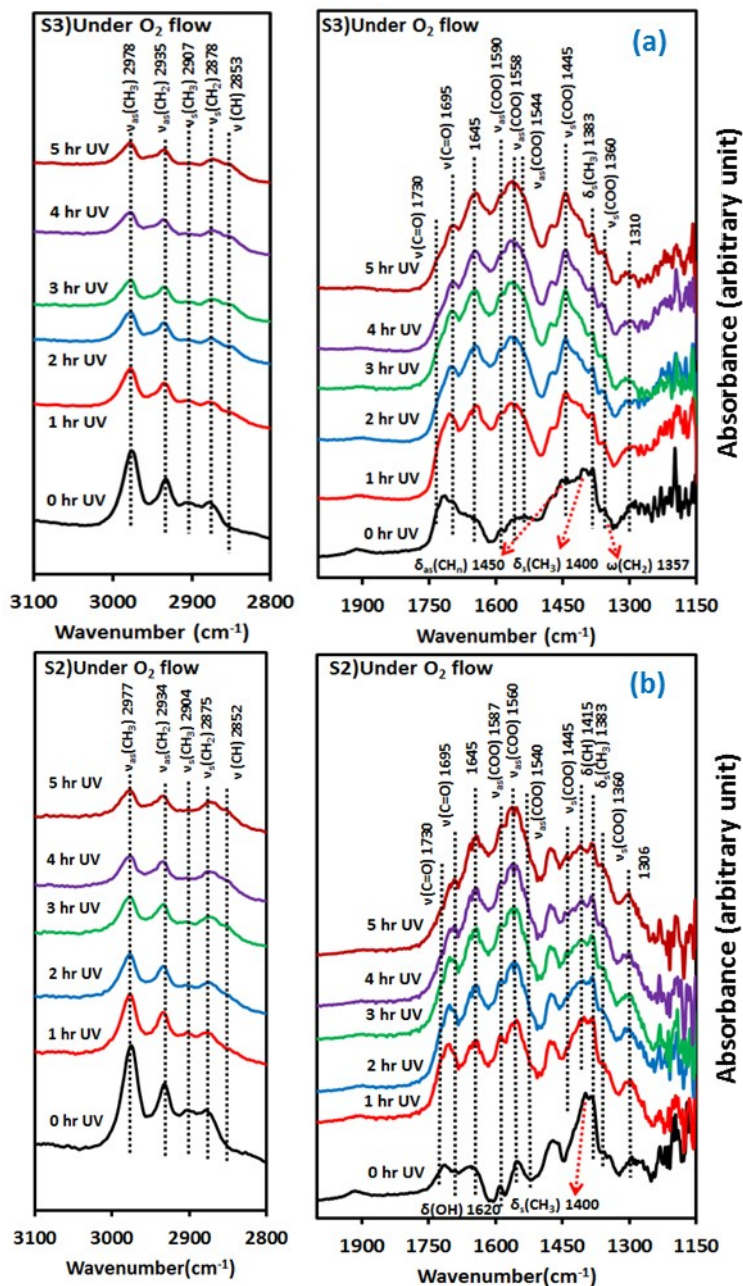

**Figure SI-4:**

FTIR spectra during the photo-reaction of ethanol in the presence of O<sub>2</sub> over (a) sample S2 (0.13 wt.% Au-0.2 wt.% Pd/TiO<sub>2</sub>) and (c) sample S3(0.06 wt.% Au-0.10 wt.% Pd/TiO<sub>2</sub>).

The surface was initially saturated with ethanol at 300 K, O<sub>2</sub> flow = 30 mL/min, P = 1 atm



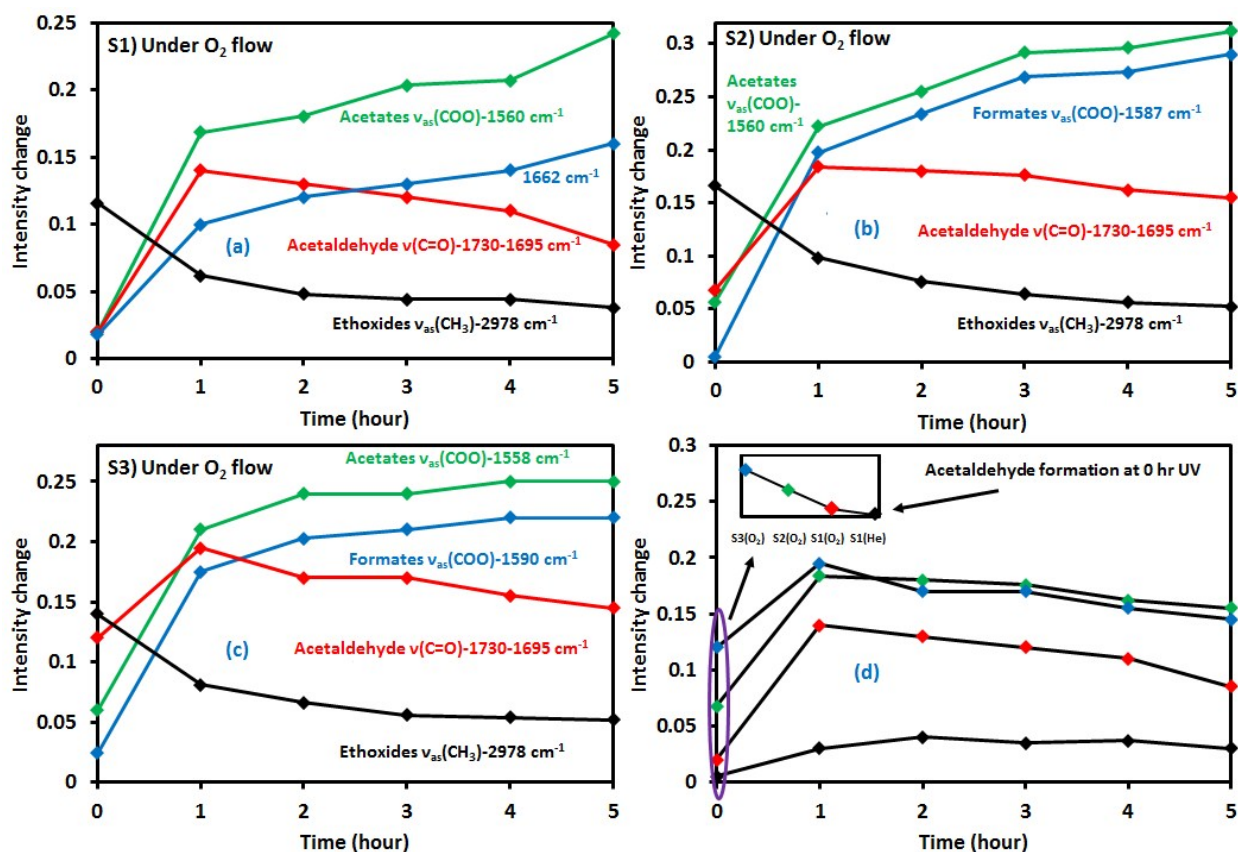

**Figure SI-5:**

Change in the IR intensity of species during the photo-reaction of ethanol in the presence of O<sub>2</sub> over Au-Pd/TiO<sub>2</sub> samples (a) S1, (b) S2 and (c) S3.

(d) Comparison of the acetaldehyde IR intensity change ( $\nu$  C=O) with time during photo-reaction of ethanol over samples S1( under He and O<sub>2</sub>), S2 (under O<sub>2</sub>) and S3 (under O<sub>2</sub>). The inset shows the formation of acetaldehyde after dark reaction (before photo-excitation) at 300 K.

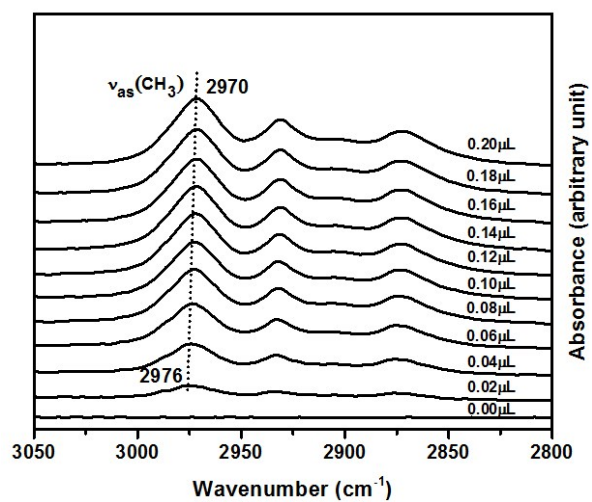

**Figure SI-6:**

IR spectra of different concentration of ethanol on TiO<sub>2</sub> (A+R) collected under vacuum ( $1 \times 10^{-3}$  Torr).

## Calculation of dissolved concentration of reaction products during photo-reforming of ethanol

The calculations are done using Dalton's law of partial pressure, Raoult's law and the Henry's law.

- According to Dalton's law of partial pressure

$$P_T = P_{H_2} + P_{CO_2} + P_{CH_3CHO} + P_{CH_4} + P_{C_2H_5OH} + P_{H_2O} + P_{N_2}$$

Where  $P_T$  = Total pressure of a mixture of gases;  $P_{H_2}$ ,  $P_{CO_2}$ ,  $P_{CH_3CHO}$ ,  $P_{CH_4}$ ,  $P_{C_2H_5OH}$ ,  $P_{H_2O}$  and  $P_{N_2}$  are the partial pressures of components inside the reactor.

- According to Raoult's law

$$P_T = P_{C_2H_5OH} + P_{H_2O}$$

$$= x_e * VP_e + x_w * VP_w$$

Where  $x_e$  and  $x_w$  are mole fractions of ethanol and water,  $VP_e$  and  $VP_w$  are the vapor pressures of ethanol and water at 300 K.

- According to Henry's law

$H^{cp} = C_a/P_i$  where  $H^{cp}$  = Henry's law constant ( $\text{mol.dm}^{-3}.\text{atm}^{-1}$ );  $C_a$  = Concentration of a species in the aqueous phase ( $\text{mol.dm}^{-3}$ ) and  $P$  = Partial pressure of that species in the gas phase under equilibrium conditions (atm)<sup>i</sup>.

---

<sup>i</sup> R. Sander, *Atmospheric Chemistry and Physics*, 2015, **15**, 4399-4981.
